# Supplementary material for: Validation of distal radius failure load predictions by homogenized- and micro-finite element analyses based on second-generation high-resolution peripheral quantitative CT images
Source: Springer Nature journal article supplement (doi:10.1007/s00198-019-04935-6), 2019-04-17
Supplement: MOESM1 [file 16662494]

**Article title:** Validation of distal radius failure load predictions by homogenized- and micro- Finite Element analyses based on second generation high resolution peripheral quantitative CT images.

**Journal Name:** Osteoporosis International

**Authors:** Andrés Julián Arias-Moreno<sup>1,3</sup>, Hadi S. Hosseini<sup>2</sup>, Melissa Bevers<sup>1</sup>, Keita Ito<sup>1</sup>, Philippe Zysset<sup>2</sup> and Bert van Rietbergen<sup>1</sup>

**Affiliations:**

1. Orthopaedic Biomechanics, Department of Biomedical Engineering, Eindhoven University of Technology, Eindhoven, The Netherlands

2. Institute for Surgical Technology and Biomechanics, University of Bern, Bern, Switzerland

3. Department of Mechanics and Production, Autonomous University of Manizales, Manizales, Colombia

**Contact of the corresponding author:**

Email: A.J.Arias.Moreno@tue.nl

## Electronic Supplementary Material 1: Convergence study

A convergence study was executed for the 22 20-mm segments in which the element size was varied from 1.0 to 0.29 elements/mm (corresponding to an element size of 1.0mm to 3.4mm). It was found that at 0.6 elements/mm (1.7 mm element size) both the stiffness and the failure load were within 5% of the value obtained when using 1 element/mm (Fig. A1). At 0.6 elements/mm stiffness values were largely converged, but failure loads were not. The latter likely relates to the fact that no non-local formulation of the failure criterion was used. However, as the localization scale for trabecular bone would be in the range of the intertrabecular distance (1-2 mm), setting the element size to a similar value would render similar results as a non-local implementation. As the cpu-time exponentially increased with reduced element size, such that solving models with 0.6 elements/mm would solve roughly 100 times faster than those with 1 element/mm and as cpu-time was an important factor for the present study, it was concluded that 0.6 elements/mm (1.7 mm element size) would be preferable.

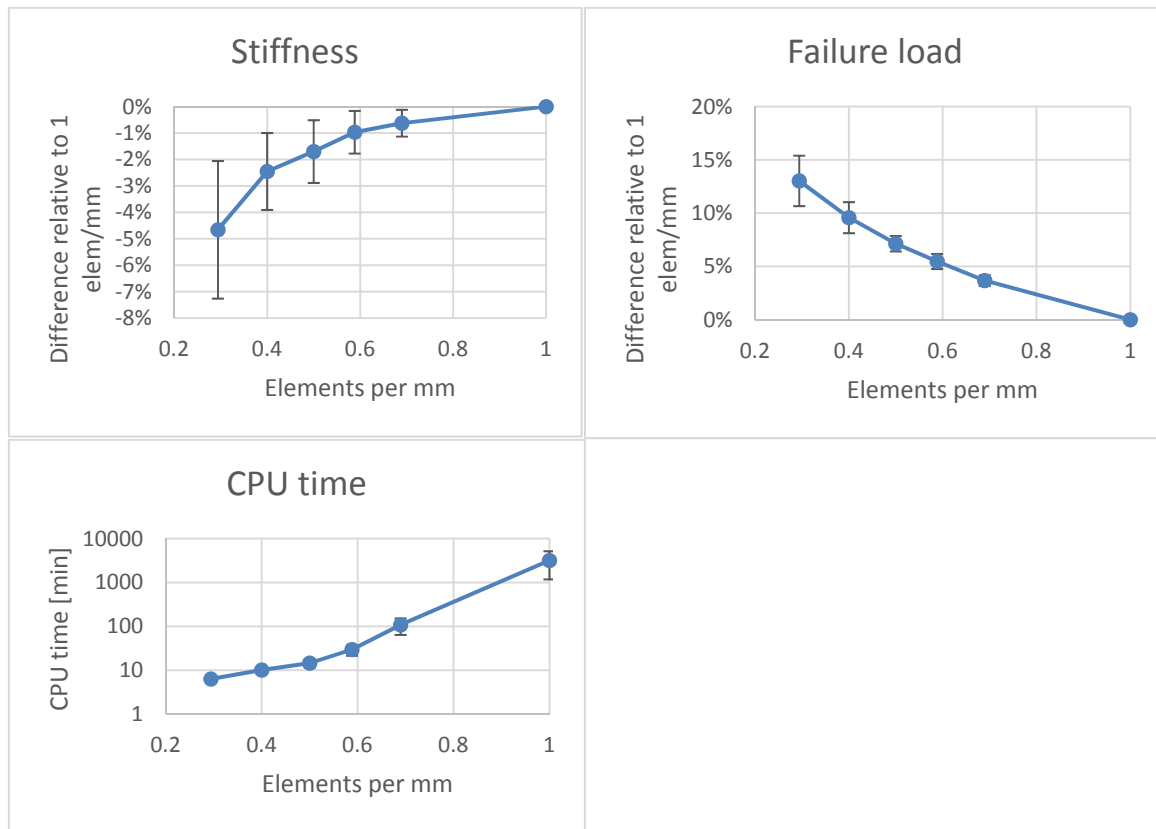

**Fig. 1** Effect of element size on the calculated stiffness (top-left) and failure load (top-right) and on the cpu-time needed for the full analysis (bottom). Error bars indicate the 95% confidence intervals.
