# Supplementary material for: Validation of distal radius failure load predictions by homogenized- and micro-finite element analyses based on second-generation high-resolution peripheral quantitative CT images
Source: Springer Nature journal article supplement (doi:10.1007/s00198-019-04935-6), 2019-04-17
Supplement: MOESM2 [file 16662494]

**Article title:** Validation of distal radius failure load predictions by homogenized- and micro- Finite Element analyses based on second generation high resolution peripheral quantitative CT images.

**Journal Name:** Osteoporosis International

**Authors:** Andrés Julián Arias-Moreno<sup>1,3</sup>, Hadi S. Hosseini<sup>2</sup>, Melissa Bevers<sup>1</sup>, Keita Ito<sup>1</sup>, Philippe Zysset<sup>2</sup> and Bert van Rietbergen<sup>1</sup>

**Affiliations:**

1. Orthopaedic Biomechanics, Department of Biomedical Engineering, Eindhoven University of Technology, Eindhoven, The Netherlands

2. Institute for Surgical Technology and Biomechanics, University of Bern, Bern, Switzerland

3. Department of Mechanics and Production, Autonomous University of Manizales, Manizales, Colombia

**Contact of the corresponding author:**

Email: A.J.Arias.Moreno@tue.nl

## Electronic Supplementary Material 2: Elastic and strength parameters used for the micro-FE and the homogenized-FE

Table 1: Elastic and strength parameters used for the micro-FE

|                                              |                          |      |
|----------------------------------------------|--------------------------|------|
| Bone tissue Young's modulus                  | $E_t$ [GPa]              | 10.0 |
| Bone tissue Poisson's ratio                  | $\nu$ [-]                | 0.3  |
| Critical volume for failure load calculation | $\nu_{crit}$ [-]         | 4%   |
| Critical value for failure load estimation   | $\varepsilon_{crit}$ [-] | 1%   |

Table 2: Elastic and strength parameters used for the homogenized FE. Bold values were determined in this study; other values were taken from [11]

|                                                      |                       |                |
|------------------------------------------------------|-----------------------|----------------|
| Bone tissue Young's modulus                          | $\varepsilon_0$ [GPa] | <b>19.01</b>   |
| Bone tissue shear modulus                            | $\mu_0$ [GPa]         | <b>7.851</b>   |
| Bone tissue Poisson's ratio                          | $\nu_0$ [-]           | 0.223          |
| Power for modulus-density relationship               | $k$ [-]               | 2              |
| Power for modulus-fabric relationship                | $l$ [-]               | 0.96           |
| Bone tissue compressive strength                     | $\sigma_0^-$ [MPa]    | <b>166</b>     |
| Bone tissue tensile strength                         | $\sigma_0^+$ [MPa]    | <b>131</b>     |
| Bone tissue shear strength                           | $\tau_0$ [MPa]        | <b>67.3</b>    |
| Interaction parameter for surface                    | $\xi_0$               | 0.26BV/TV+0.23 |
| Power for strength-density relationship              | $P$                   | 1.82           |
| Power for strength-fabric relationship               | $q$                   | 0.79           |
| Prescribed cumulated plastic strain at ultimate load | $\kappa_{max}$        | 0.02           |
| Plastic hardening rate                               | $S$                   | 100            |
| Critical damage value                                | $D_c$                 | 0.75           |
| Damage rate                                          | $a$                   | 7.0            |
