# Supplementary material for: Validation of distal radius failure load predictions by homogenized- and micro-finite element analyses based on second-generation high-resolution peripheral quantitative CT images
Source: Springer Nature journal article supplement (doi:10.1007/s00198-019-04935-6), 2019-04-17
Supplement: MOESM3 [file 16662494]

**Article title:** Validation of distal radius failure load predictions by homogenized- and micro- Finite Element analyses based on second generation high resolution peripheral quantitative CT images.

**Journal Name:** Osteoporosis International

**Authors:** Andrés Julián Arias-Moreno<sup>1,3</sup>, Hadi S. Hosseini<sup>2</sup>, Melissa Bevers<sup>1</sup>, Keita Ito<sup>1</sup>, Philippe Zysset<sup>2</sup> and Bert van Rietbergen<sup>1</sup>

**Affiliations:**

1. Orthopaedic Biomechanics, Department of Biomedical Engineering, Eindhoven University of Technology, Eindhoven, The Netherlands

2. Institute for Surgical Technology and Biomechanics, University of Bern, Bern, Switzerland

3. Department of Mechanics and Production, Autonomous University of Manizales, Manizales, Colombia

**Contact of the corresponding author:**

Email: A.J.Arias.Moreno@tue.nl

Electronic Supplementary Material 3: Damage plot (hFE) and Von Mises Strain distributions (mFE and hFE) for modelled sections

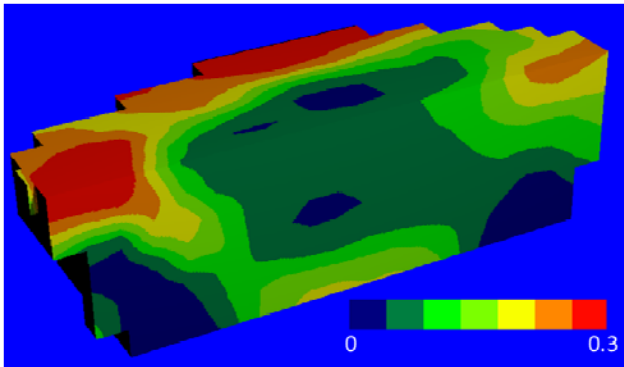

**Fig 1.** Damage distribution at the failure load for the hFE model of one of the samples just after reaching the failure load. The model is cut in half to reveal the inside strain distribution.

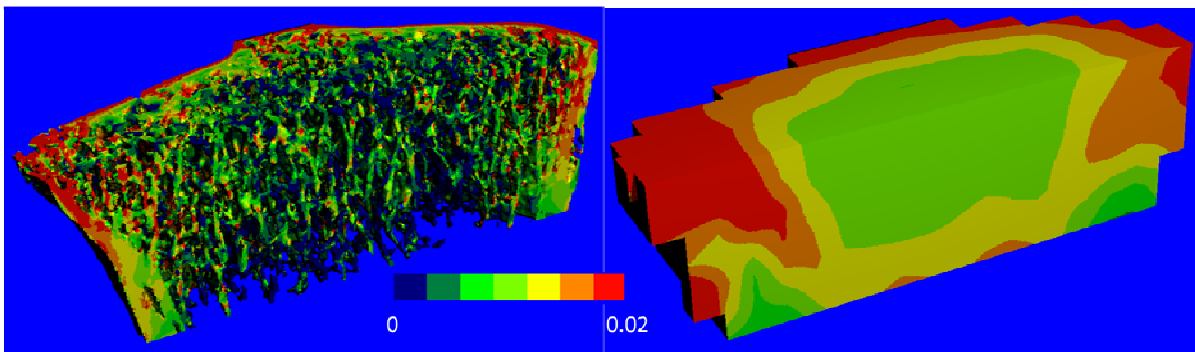

**Fig 2.** Von Mises strain calculated for the mFE model (left) and the hFE model (right) for one of the samples compressed to a 1% strain. The models are cut in half to reveal the inside strain distribution.
