# Supplementary material for: Validation of distal radius failure load predictions by homogenized- and micro-finite element analyses based on second-generation high-resolution peripheral quantitative CT images
Source: Springer Nature journal article supplement (doi:10.1007/s00198-019-04935-6), 2019-04-17
Supplement: MOESM4 [file 16662494]

**Article title:** Validation of distal radius failure load predictions by homogenized- and micro- Finite Element analyses based on second generation high resolution peripheral quantitative CT images.

**Journal Name:** Osteoporosis International

**Authors:** Andrés Julián Arias-Moreno<sup>1,3</sup>, Hadi S. Hosseini<sup>2</sup>, Melissa Bevers<sup>1</sup>, Keita Ito<sup>1</sup>, Philippe Zysset<sup>2</sup> and Bert van Rietbergen<sup>1</sup>

**Affiliations:**

1. Orthopaedic Biomechanics, Department of Biomedical Engineering, Eindhoven University of Technology, Eindhoven, The Netherlands

2. Institute for Surgical Technology and Biomechanics, University of Bern, Bern, Switzerland

3. Department of Mechanics and Production, Autonomous University of Manizales, Manizales, Colombia

**Contact of the corresponding author:**

Email: B.v.Rietbergen@tue.nl



```

$ IF (F$SEARCH(IPL_SEGAIM) .EQS. "")
$ THEN
$ WRITE SYS$OUTPUT "-----"
$ WRITE SYS$OUTPUT " ERROR: cannot find file: ",IPL_SEGAIM
$ WRITE SYS$OUTPUT " This task can only run after the standard patient evaluation is
completed
$ WRITE SYS$OUTPUT "-----"
$ STOP
$ ENDIF
$ IF (F$SEARCH(IPL_GOBJ0) .EQS. "")
$ THEN
$ WRITE SYS$OUTPUT "-----"
$ WRITE SYS$OUTPUT " ERROR: cannot find file: ",IPL_GOBJ0
$ WRITE SYS$OUTPUT " This task can only run after the standard patient evaluation is
completed
$ WRITE SYS$OUTPUT "-----"
$ STOP
$ ENDIF
$ ON ERROR THEN EXIT
$!-----
$! First part of the IPL script: pre-processing
$!-----
$ IPLFE_BATCH

```

! ---- Read segmented aim generated by the default image processing. For XT2  
! this file already has different values for the cort/trab compartments

```

/read
-name          comb
-filename      "IPL_SEGAIM

```

! ---- only include the regions indicated by the gobj

```

/gobj_maskaimpeel_ow
-input_output  comb
-gobj_filename "IPL_GOBJ0
-peel_iter     0

```

! ---- Delete unconnected parts

```

/cl_rank_extract
-input         comb
-output        cl
-first_rank    1
-last_rank     1
-connect_boundary false
-value_in_range 1

```

```
/multiply_volumes
-input1      comb
-input2      cl
-output      out
-common_region_only  false
-multiply_zero_pixels  true
```

```
/del comb
/del cl
```

! ---- Remove empty space around the bone, if any

```
/bounding_box_cut
-input      out
-output     fem
-z_only     false
-border     0 0 0
```

```
/del out
```

```
/write
-name      fem
-filename   "IPL_FNAME0  ! (_MFE.AIM)
-compress_type  bin
```

```
..
```

```
#! -----
```

```
#! Second part of the IPL script: the actual FE-analysis
```

```
#! -----
```

```
$ IPLFE_BATCH
```

```
/read
-name      fem
-filename   "IPL_FNAME0  ! (_MFE.AIM)
```

```
/fe_solve3
-in      fem
-fea_file_name  "JOB_NAME  ! (_MFE)
-problem_nr  "IPL_PROBLEM
-scale_factor  -0.01
-list_option  1
-tolerance_force  1.000000E-03
-tolerance_displ  1.000000E+00
-max_nr_iter  50000
-restart_option  0
-comp_val_mat_001  126
-Ymodulus_mat_001  "IPL_FEA0
-Poissonr_mat_001  3.000000E-01
-comp_val_mat_002  127
```

```

-Ymodulus_mat_002      "IPL_FEA1
-Poissonr_mat_002      3.000000E-01
-comp_val_mat_003      0
-Ymodulus_mat_003      1.000000E+04
-Poissonr_mat_003      3.000000E-01
..
$! -----
$! Third part of the IPL script: post-processing
$! -----
$ IPLFE_BATCH

/db_scanco_activate
-write                true

! ---- use the voxgobj to get the correct threshold in the database

/read
-name                 fem
-filename              "IPL_FNAME0    ! (_MFE.AIM)

/voxgobj_scanco_param
-input                 fem
-gobj_filename        "IPL_GOBJ0
-peel_iter             -1
-region_number        0

/del fem

! ---- do the postprocessing and store results in the database

/fe_post
-post_file_name       "JOB_NAME      ! (_MFE)
-output               res
-variable_nr          "IPL_FEPAR_NO
-loadcase_nr          1
-list_option          1
-interpol_option      1
-averaging_option     0
-test_dir             0
-critical_variable_nr "IPL_FEPAR_NO    ! Not available in FE v01.*
-critical_volume      "IPL_FEA2
-critical_value       "IPL_FEA3

/write
-name                 res
-filename              "IPL_FNAME1    ! (_MFE_RESULT.AIM)
..
$!

```



```

$!
$! ---- Check if the required input files exist
$!
$ IF (F$SEARCH(IPL_AIM) .EQS. "")
$ THEN
$ WRITE SYS$OUTPUT "-----"
$ WRITE SYS$OUTPUT " ERROR: cannot find file: ",IPL_AIM
$ WRITE SYS$OUTPUT " This task can only run after the standard patient evaluation is
completed
$ WRITE SYS$OUTPUT "-----"
$ STOP
$ ENDIF
$ IF (F$SEARCH(IPL_SEGAIM) .EQS. "")
$ THEN
$ WRITE SYS$OUTPUT "-----"
$ WRITE SYS$OUTPUT " ERROR: cannot find file: ",IPL_SEGAIM
$ WRITE SYS$OUTPUT " This task can only run after the standard patient evaluation is
completed
$ WRITE SYS$OUTPUT "-----"
$ STOP
$ ENDIF
$ IF (F$SEARCH(IPL_GOBJ0) .EQS. "")
$ THEN
$ WRITE SYS$OUTPUT "-----"
$ WRITE SYS$OUTPUT " ERROR: cannot find file: ",IPL_GOBJ0
$ WRITE SYS$OUTPUT " This task can only run after the standard patient evaluation is
completed
$ WRITE SYS$OUTPUT "-----"
$ STOP
$ ENDIF
$ IF (F$SEARCH(IPL_GOBJ1) .EQS. "")
$ THEN
$ WRITE SYS$OUTPUT "-----"
$ WRITE SYS$OUTPUT " ERROR: cannot find file: ",IPL_GOBJ1
$ WRITE SYS$OUTPUT " This task can only run after the standard patient evaluation is
completed
$ WRITE SYS$OUTPUT "-----"
$ STOP
$ ENDIF
$!
$! ---- When using hex elements, use a low mask threshold such that any element
$! touching the mask is included. When using tet elements, threshold at 50%
$! to get the proper contours
$!
$ IF (IPL_MISC1_1 .EQ. 1)
$ THEN
$ SCALE_THRESHOLD == 10
$ ELSE

```

```

$ IF (IPL_MISC1_1 .EQ. 2)
$ THEN
$   SCALE_THRESHOLD == 500
$ ELSE
$   WRITE SYS$OUTPUT "-----"
$   WRITE SYS$OUTPUT " Invalid meshing option: ", IPL_MISC1_1
$   WRITE SYS$OUTPUT " Valid options are 1 and 2 only
$   WRITE SYS$OUTPUT "-----"
$   EXIT 2
$ ENDIF
$ ENDIF
$ ON ERROR THEN EXIT
$!-----
$! First part of the IPL script: pre-processing and homogenization
$!-----
$ IPLFE_BATCH

```

! ---- Read the original input files

```

/read
-name          org_in
-filename      "IPL_AIM

/read
-name          seg_in
-filename      "IPL_SEGAIM

/gobj_to_aim
-gobj_filename "IPL_GOBJ0
-output       full_mask_in
-peel_iter    0

/gobj_to_aim
-gobj_filename "IPL_GOBJ1
-output       trab_mask_in
-peel_iter    0

```

! ---- Make a common 'canvas' to which all images will be pasted to ensure  
! they are positioned in the proper way relative to each other when  
! removing the pos later

```

/threshold
-input         org_in
-output       tmp
-lower_in_perm_aut_al  999999
-upper_in_perm_aut_al  0
-value_in_range  0
-unit         0

```

! ---- Set a border of `downscale_factor` voxels around the canvas in x/y-dir  
! This is needed later for better density interpolation when using tet elements

```
/border_change  
-input      tmp  
-output     canvas  
-border     "IPL_MISC1_0 "IPL_MISC1_0 0
```

```
/del tmp
```

! ---- Now place all images in the canvas

```
/concat  
-input1     canvas  
-input2     org_in  
-output     org_canv  
-common_region_only  false  
-add_not_overlay  false
```

```
/del org_in
```

```
/concat  
-input1     canvas  
-input2     seg_in  
-output     seg_canv  
-common_region_only  false  
-add_not_overlay  false
```

```
/del seg_in
```

```
/concat  
-input1     canvas  
-input2     full_mask_in  
-output     full_mask_canv  
-common_region_only  false  
-add_not_overlay  false
```

```
/del full_mask_in
```

```
/concat  
-input1     canvas  
-input2     trab_mask_in  
-output     trab_mask_canv  
-common_region_only  false  
-add_not_overlay  false
```

```
/del trab_mask_in
```

! ---- Now all images are pasted in the same canvas, crop all images to the volume of  
! interest (voi) which is defined as the volume of seg with a border in x/y-dir  
! of `downscale_factor` voxels.  
! This will remove any slices potentially lost due to slice matching from all images.

! ---- first get the voi

```
/gobj_maskaimpeel_ow  
-input_output      seg_canv  
-gobj_filename     "IPL_GOBJ0  
-peel_iter        0
```

```
/bounding_box_cut  
-input            seg_canv  
-output          voi  
-z_only          false  
-border          "IPL_MISC1_0 "IPL_MISC1_0 0      ! Create the voi border in x/y-dir only
```

```
/set_value  
-input          voi  
-value_object   0  
-value_background 0
```

! ---- then crop all images to the voi dim and pos

```
/concat  
-input1         voi  
-input2         org_canv  
-output         org  
-common_region_only true  
-add_not_overlay false
```

```
/del org_canv
```

```
/concat  
-input1         voi  
-input2         seg_canv  
-output         seg  
-common_region_only true  
-add_not_overlay false
```

```
/del seg_canv
```

```
/concat  
-input1         voi  
-input2         full_mask_canv  
-output         full_mask
```

```
-common_region_only true
-add_not_overlay false
```

```
/del full_mask_canv
```

```
/concat
-input1 voi
-input2 trab_mask_canv
-output trab_mask
-common_region_only true
-add_not_overlay false
```

```
/del trab_mask_canv
```

```
/del voi
```

```
/exa org geo
/exa seg geo
/exa trab_mask geo
/exa full_mask geo
```

! ---- Set the pos of all files to zero such that alignment of downscaled and  
! high-resolution images is exact for any down\_scale\_factor.  
! For example, if this is not done and the pos was 49 and the downscale  
! factor 10, the downscaled image would have a pos of 4. The error in the  
! pos thus would be 9 voxels in size. This would affect the calculation of  
! the element density/fabric later. By setting the pos to zero, no such  
! errors occur

```
/header_geo_set
-input org
-off_new -1 -1 -1
-pos_new 0 0 0
-el_size_mm_new -1.0 -1.0 -1.0
```

```
/header_geo_set
-input seg
-off_new -1 -1 -1
-pos_new 0 0 0
-el_size_mm_new -1.0 -1.0 -1.0
```

```
/header_geo_set
-input full_mask
-off_new -1 -1 -1
-pos_new 0 0 0
-el_size_mm_new -1.0 -1.0 -1.0
```

```
/header_geo_set
-input trab_mask
```

```
-off_new      -1 -1 -1
-pos_new      0 0 0
-el_size_mm_new -1.0 -1.0 -1.0
```

```
/exa trab_mask geo
```

```
! ----- create the cortical and trabecular compartment masks
```

```
/subtract_aims
```

```
-input1      full_mask
-input2      trab_mask
-output      cort_mask
```

```
/set_value
```

```
-input      trab_mask
-value_object 1
-value_background 0
```

```
/set_value
```

```
-input      cort_mask
-value_object 2
-value_background 0
```

```
! ---- Generate the mesh
```

```
/fe_mesh
```

```
-in          full_mask
-out_filename "IPL_FNAME3    ! (_HFE_BASE.INP)
-output_format abaqus
-down_scale_factor "IPL_MISC1_0
-threshold_value "SCALE_THRESHOLD
-threshold_unit 6
-max_nr_groups 0
-meshing_option "IPL_MISC1_1
-element_order 1
-use_hex_as_tet false
-oddcase_start true
-optimize_bw fasle
-max_aspect_ratio 1.000000
-min_side_length 0.100000
-global_pos_flag true
-problem_nr 0
-max_nr_mat 0
-density_option 0
-ref_density 1.000000
-Emod_const_a 10000.000000
-Emod_const_b 0.000000
-Emod_const_p 1.000000
```

-Poissons\_ratio 0.300000

/del full\_mask

! ---- calculate element density and fabric for the trabecular elements

/hfe\_homogenize

-org org  
-seg seg  
-mask trab\_mask  
-mesh\_infile\_name "IPL\_FNAME3 ! (\_HFE\_BASE.INP)  
-mesh\_outfile\_name "IPL\_FNAME4 ! (\_HFE\_TRAB.INP)  
-VOI\_radius 2.000000  
-volfrac\_option 2  
-volfrac\_ref\_density 1200.000000  
-volfrac\_min 0.001  
-fabric\_option "IPL\_MISC1\_2  
-fabric\_min\_volume 8.000000  
-fabric\_min\_volfrac 0.050000  
-fabric\_power\_transform 1.0  
-MIL\_peel\_iter 0  
-MIL\_ip\_sigma 0.000000  
-MIL\_ip\_support 0  
-MIL\_ip\_threshold 50  
-MIL\_nr\_ave\_iter 2  
-MIL\_t\_dir\_radius 2  
-MIL\_epsilon 1.200000  
-list\_option 2

/del trab\_mask

! ---- calculate element density but no fabric for the cortical elements

! Set a very small radius: will be set to element size by /hfe\_homogenize

/hfe\_homogenize

-org org  
-seg seg  
-mask cort\_mask  
-mesh\_infile\_name "IPL\_FNAME4 ! (\_HFE\_TRAB.INP)  
-mesh\_outfile\_name "IPL\_FNAME0 ! (\_HFE.INP)  
-VOI\_radius 0.010000  
-volfrac\_option 2  
-volfrac\_ref\_density 1200.000000  
-volfrac\_min 0.001  
-fabric\_option 0  
-fabric\_min\_volume 8.000000  
-fabric\_min\_volfrac 0.050000  
-fabric\_power\_transform 1.0

```
-MIL_peel_iter      0
-MIL_ip_sigma       0.000000
-MIL_ip_support     0
-MIL_ip_threshold   50
-MIL_nr_ave_iter    2
-MIL_t_dir_radius   2
-MIL_epsilon        1.200000
-list_option        2
```

```
/del org
/del seg
/del cort_mask
```

```
..
$ DEL 'IPL_FNAME3';*
$ DEL 'IPL_FNAME4';*
$!
$! -----
$! Second part of the IPL script: the actual FE-analysis
$! -----
$!
$ IPLFE_BATCH
```

```
/hfe_solve
-in_file_name       "IPL_FNAME0    ! (_HFE.INP)
-job_file_name      "JOB_NAME     ! (_HFE_XT2_STD)
-Eparams            19010. 7851 0.223
-Epowers            2.00 0.96 1.00
-Sparams            131. 166. 67.3
-Spowers            1.82 0.79 1.00
-CHI                0.23 0.26
-Dparams            0.750 7.000
-Hparams            100.000 0.020
-problem_nr         "IPL_PROBLEM
-scale_factor        -0.05000000
-nod_select_tol     0.010
-nr_steps            100
-tolerance           0.001
-max_nr_iter         20
-assembly_every_iters 3
-max_force_drop      0.020000
-list_option         1
```

```
..
$!
$! -----
$! Third part of the IPL script: additional post-processing
$! -----
$!
$ POST1:
```

```

$ IF (IPL_FEPAR_NO.EQ.0) THEN GOTO POST2
$ IPLFE_BATCH

/db_scanco_activate
-write          true

! ---- use the voxgobj to get the correct threshold in the database

/read
-name           in
-filename       "IPL_SEGAIM

/voxgobj_scanco_param
-input          in
-gobj_filename  "IPL_GOBJ0
-peel_iter      -1
-region_number  0

! ---- create first plot

/hfe_post
-job_file_name  "JOB_NAME      ! (_HFE_XT2_STD)
-out            res
-dim_out        -1 -1 -1
-pos_out        -1 -1 -1
-el_size_mm_out -1 -1 -1
-variable_nr    "IPL_FEPAR_NO
-loadstep_nr    1
-interpol_option 2
-defplot_scaling 0.000000
-list_option    1

/write
-name          res
-filename       "IPL_FNAME1    ! (_HFE_FST_INC_RESULTS.AIM)
-compress_type  bin

..
$!
$ POST2:
$ IF (IPL_FEA0.EQ.0) THEN EXIT
$ IPLFE_BATCH

/db_scanco_activate
-write          true

! ---- create 2nd plot

/hfe_post

```

```
-job_file_name      "JOB_NAME      ! (_HFE_XT2_STD)
-out                res
-dim_out            -1 -1 -1
-pos_out            -1 -1 -1
-el_size_mm_out     -1 -1 -1
-variable_nr        "IPL_FEA0
-loadstep_nr        99999
-interpol_option    2
-defplot_scaling    0.000000
-list_option        1

/write
-name              res
-filename          "IPL_FNAME2      ! (_HFE_LST_INC_RESULTS.AIM)
-compress_type     bin
..
$!
```
